# Supplementary material for: Controllable synthesis and electrochemical capacitor performance of MOF-derived MnOx/N-doped carbon/MnO2composites
Source: Royal Society of Chemistry journal article supplement (doi:10.1039/c9qi00596j), 2019-01-01
Supplement: c9qi00596j1.pdf [file c9qi00596j1.pdf]

Electronic Supporting Information (ESI)

**Controllable synthesis and electrochemical capacitor performance of MOF-derived  
MnO<sub>x</sub>/N-doped carbon/MnO<sub>2</sub> composites**

Kuaibing Wang,<sup>a</sup> Huijian Wang,<sup>a</sup> Rong Bi,<sup>a</sup> Yang Chu,<sup>a</sup> Zikai Wang,<sup>a,c</sup> Hua Wu,<sup>a,\*</sup> Huan Pang<sup>b,\*</sup>

<sup>a</sup> Department of Chemistry, College of Sciences  
Nanjing Agricultural University  
Nanjing 210095, Jiangsu, P. R. China  
E-mail: wuhua@njau.edu.cn

<sup>b</sup> School of Chemistry and Chemical Engineering  
Yangzhou University  
Yangzhou 225009, Jiangsu, P. R. China  
E-mail: huanpangchem@hotmail.com; panghuan@yzu.edu.cn

<sup>c</sup> College of Resources and Environmental Sciences  
Nanjing Agricultural University  
Nanjing 210095, Jiangsu, P. R. China

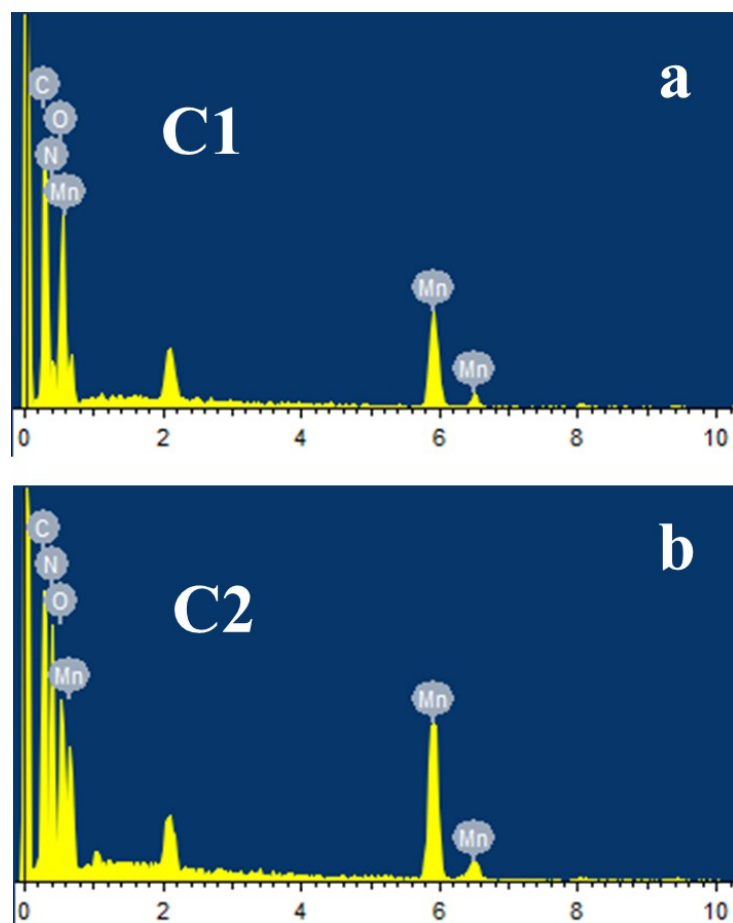

**Fig. S1.** Structural characterization. EDX patterns of MOF-derived C1 and C2 sample.

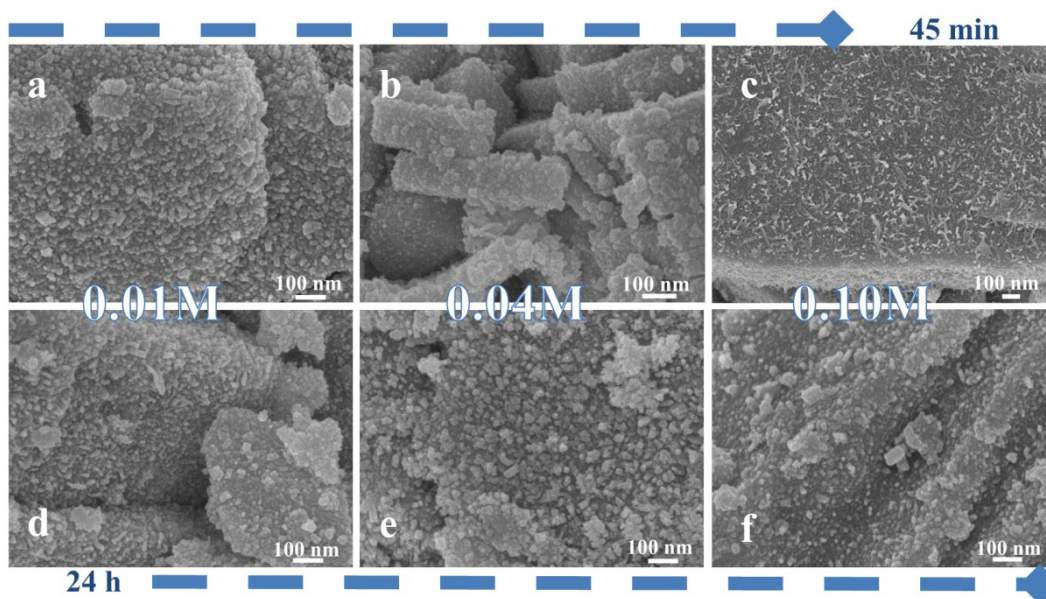

**Fig. S2.** Morphology characterization of C2-x-y samples. (a-c) SEM images of C2-x-45min sample. (d-f) SEM images of C2-x-24h sample.

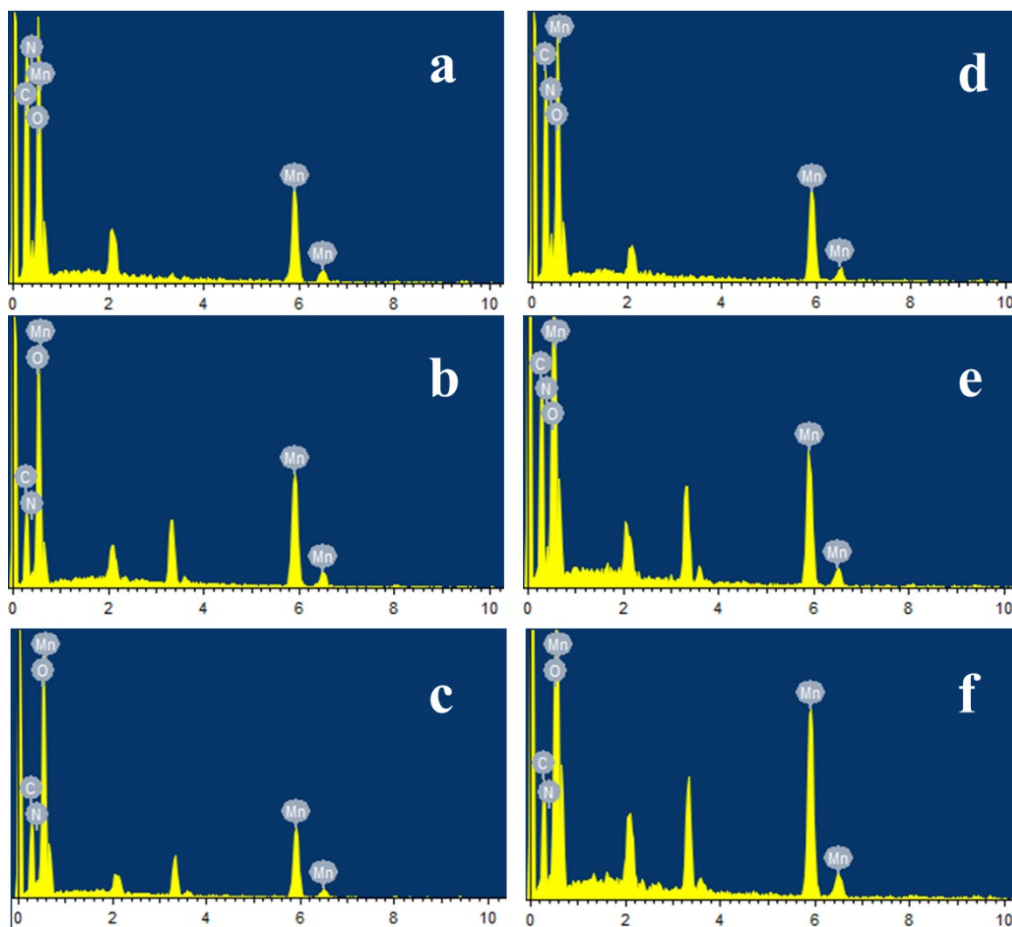

**Fig. S3.** Structural characterization of C1-derived samples. (a-c) EDX patterns of C1-x-45min samples. (d-f) EDX patterns of C1-x-24h samples.

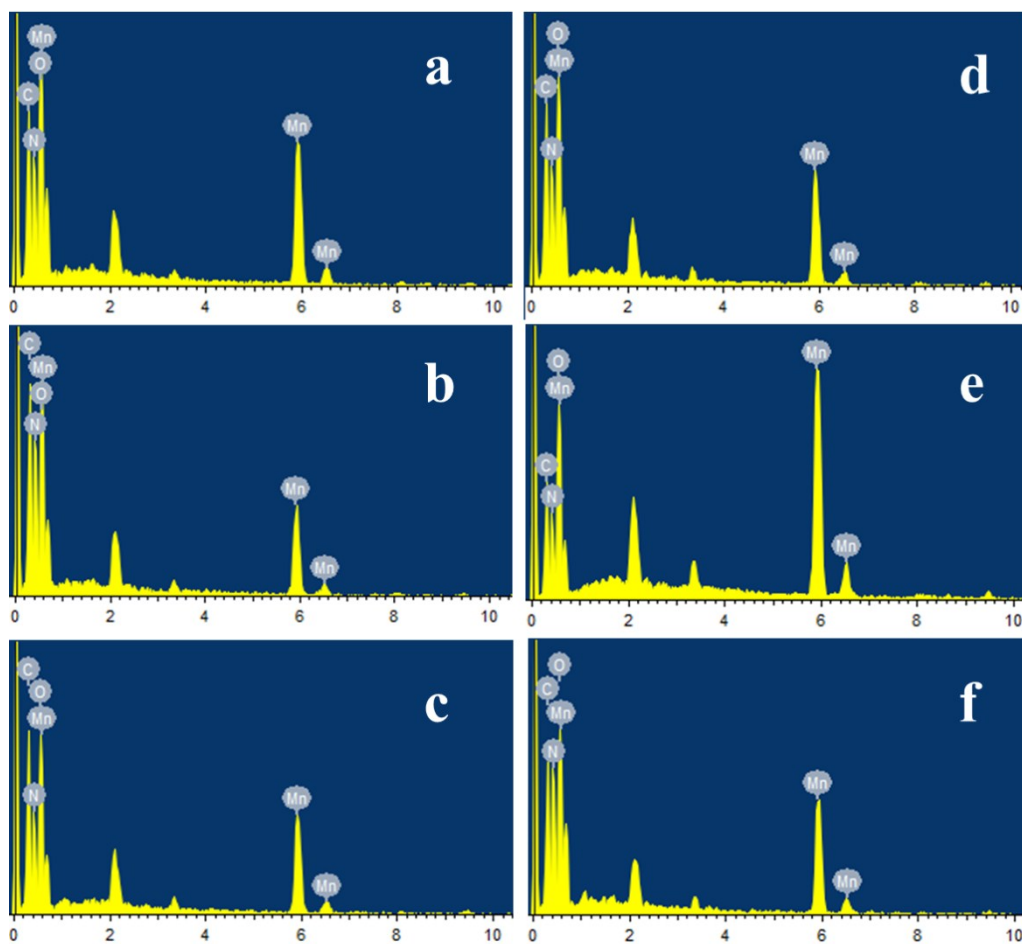

**Fig. S4.** Structural characterization of C2-derived samples. (a-c) EDX patterns of C2-x-45min samples. (d-f) EDX patterns of C2-x-24h samples.

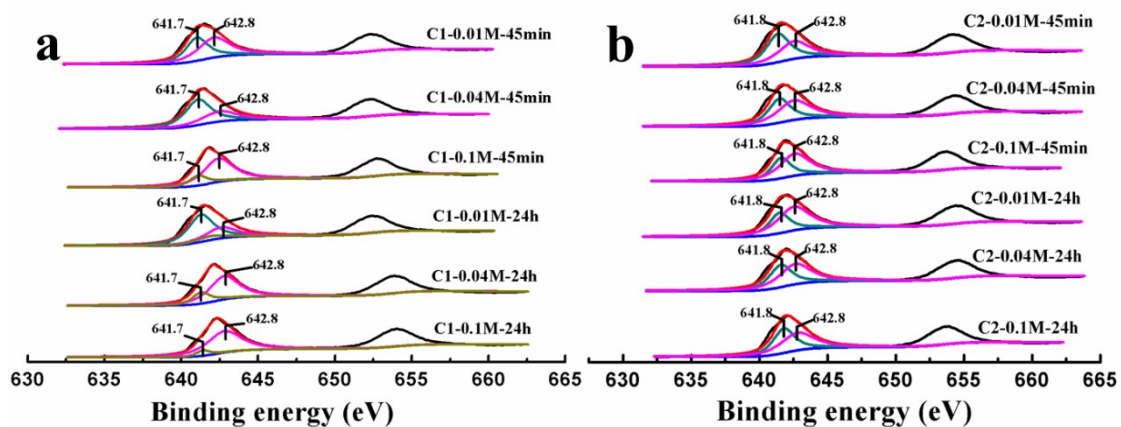

**Fig. S5.** XPS characterization of C1 and C2-derived samples. (a) Deconvolution of the Mn 2p region of C1-x-y samples. (b) Deconvolution of the Mn 2p region of C2-x-y products.

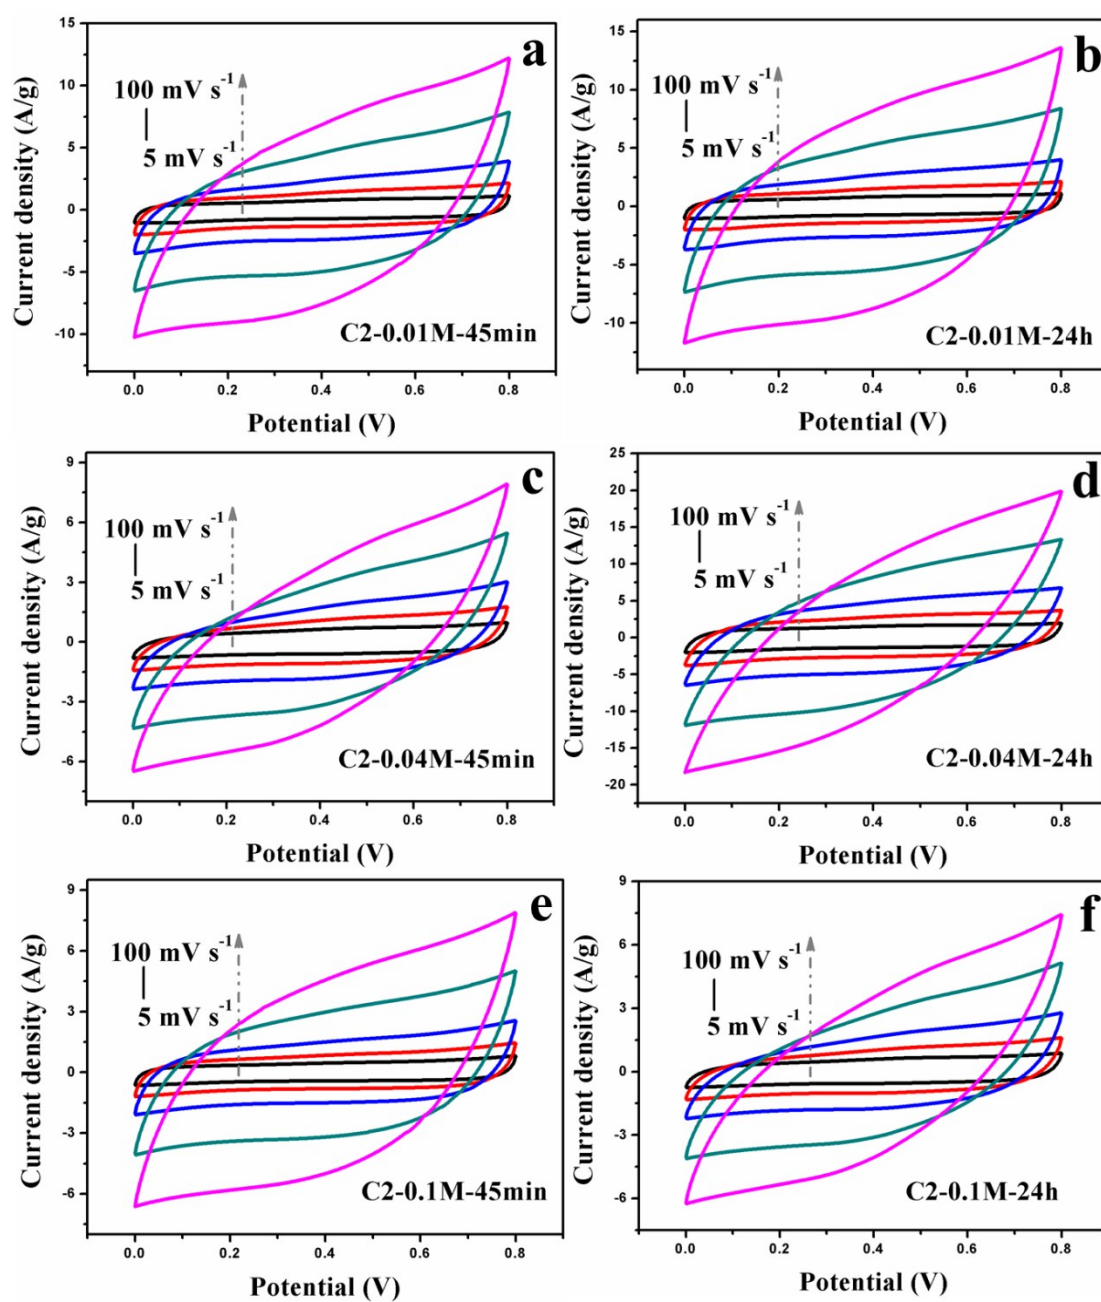

**Fig. S6.** Electrochemical performance. (a-b) CV curves of as-synthesized C2-0.01M-y electrodes at different scan rates. (c-d) CV curves of as-synthesized C2-0.04M-y electrodes at different scan rates. (e-f) CV curves of as-synthesized C2-0.10M-y electrodes at different scan rates.

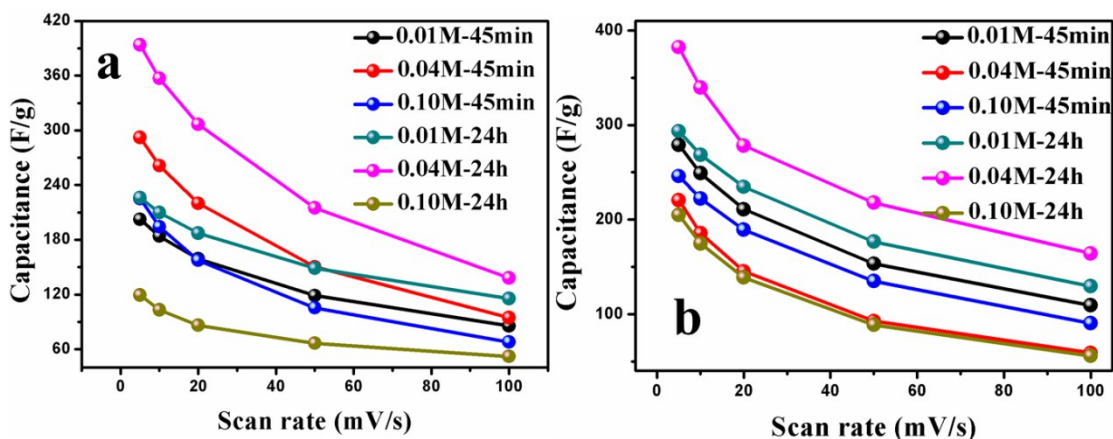

**Fig. S7.** CV Comparison. (a) The specific capacitances of C1-x-y electrodes calculated according to the CV curves at different scan rates. (b) The specific capacitances of C2-x-y electrodes calculated according to the CV curves at different scan rates.

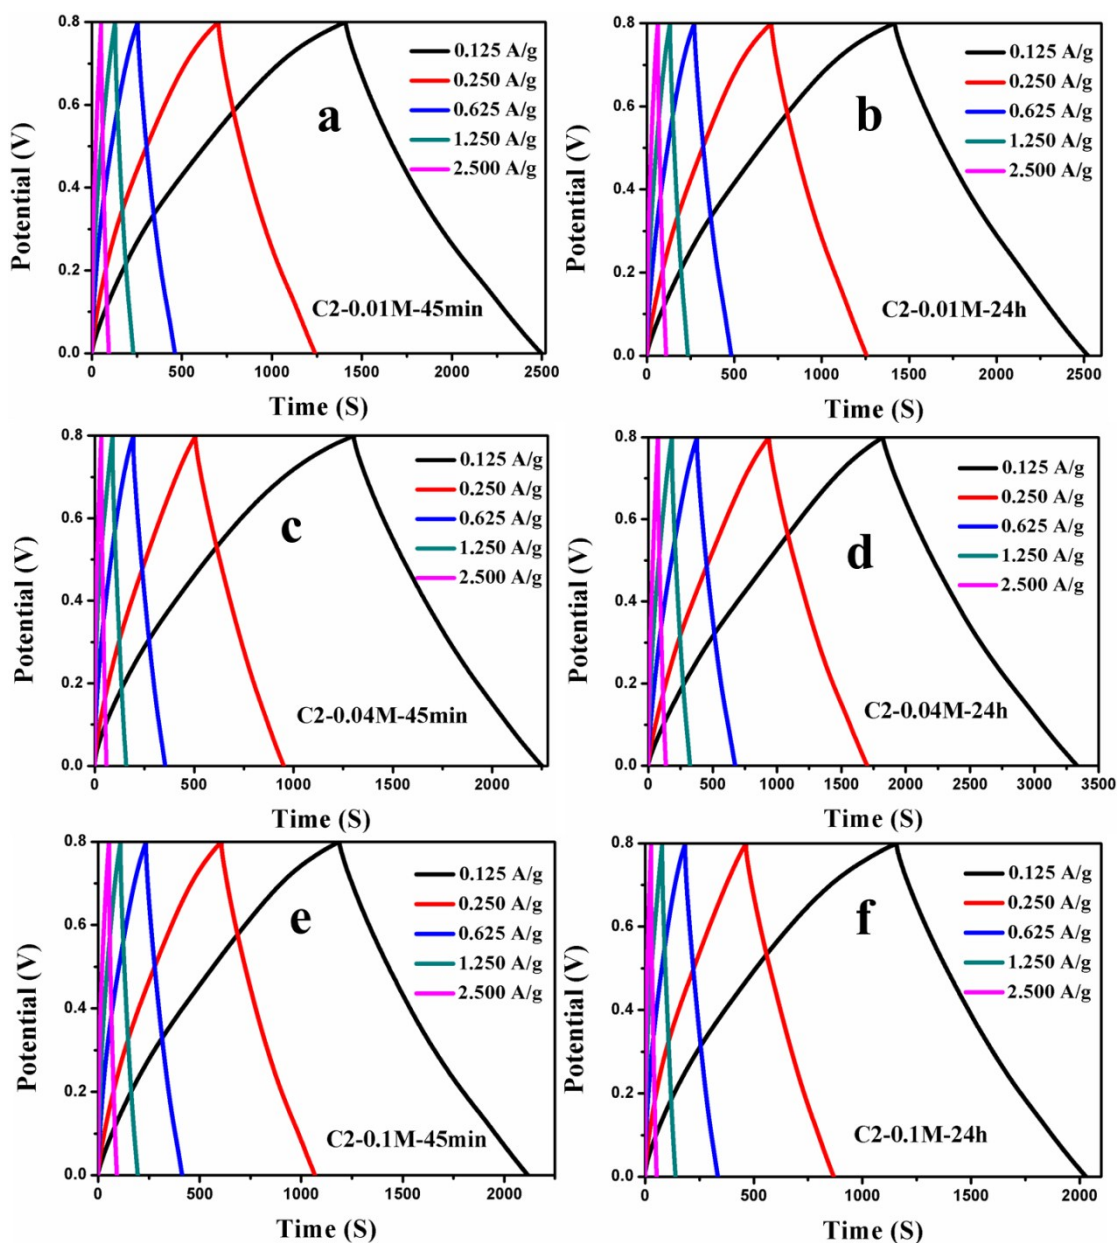

**Fig. S8.** Charge-discharge curves. (a-b) CP curves of as-synthesized C2-0.01M-y electrodes at different current densities. (c-d) CP curves of as-synthesized C2-0.04M-y electrodes at



different current densities. (e-f) CP curves of as-synthesized C2-0.10M-y electrodes at different current densities.

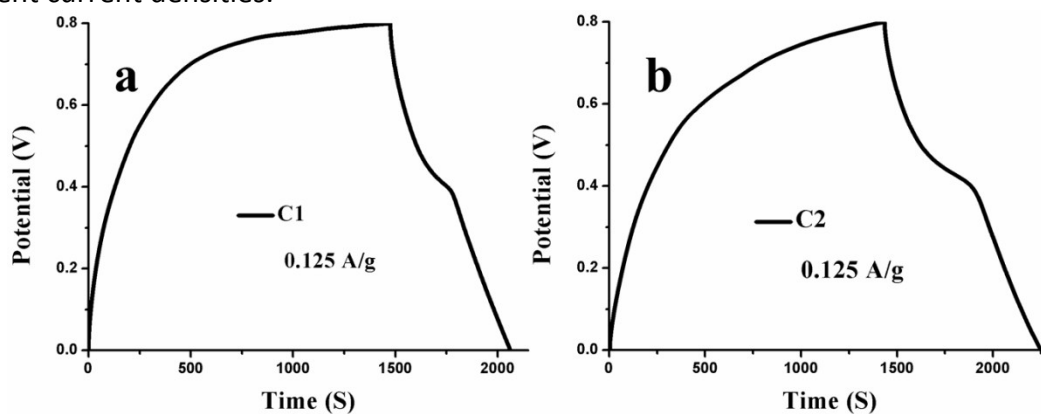

**Fig. S9.** CP curves of electrode C1 and C2 at a current density of  $0.125 \text{ A g}^{-1}$ .

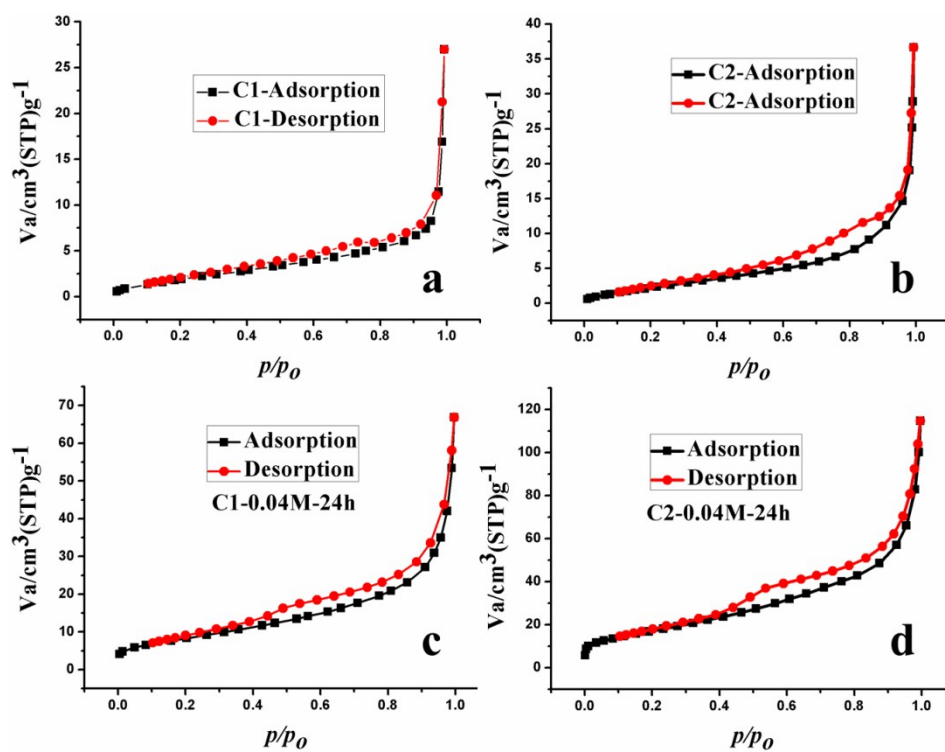

**Fig. S10.**  $\text{N}_2$  adsorption-desorption curves for C1 (a), C2 (b), C1-0.04M-24h (c) and C2-0.04M-24h (d) respectively.

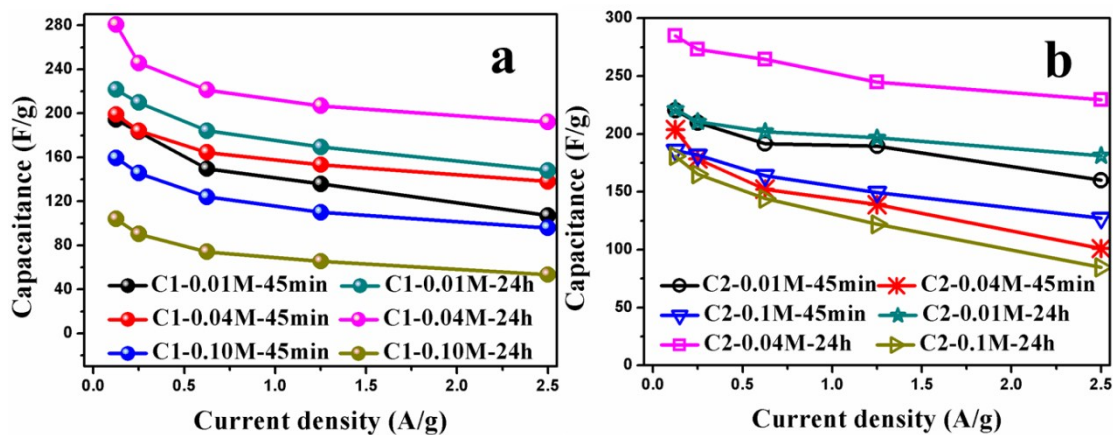

**Fig. S11.** CP comparison. (a) Specific capacitance variations of C1-x-y electrodes at different current densities. (b) Specific capacitance variations of C2-x-y electrodes at different current densities.

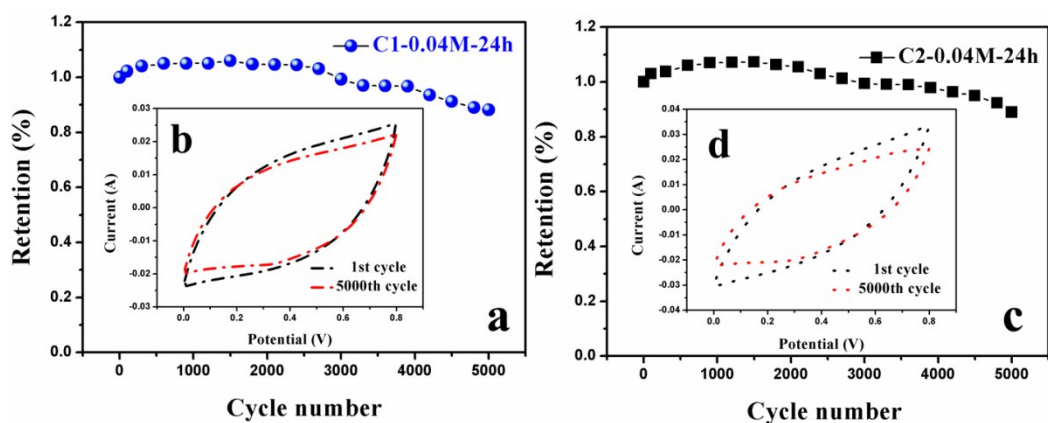

**Fig. S12.** Cycling-life test. a) Endurance test for as-prepared C1-0.04M-24h electrode at a constant scan rate of  $100 \text{ mV s}^{-1}$ . b) Compared CV curves before and after 3000 cycles. (c-d) Cycling test and Compared CV curves for C2-0.04M-24h electrode at a scan rate of  $100 \text{ mV s}^{-1}$ .

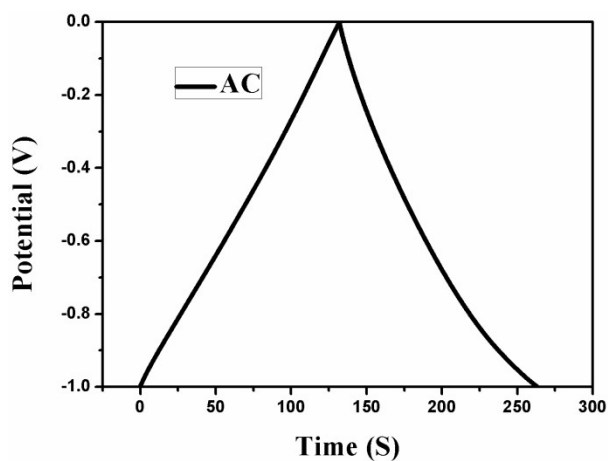

**Fig. S13.** CP curve of AC at a current density of  $1.0 \text{ A g}^{-1}$ .

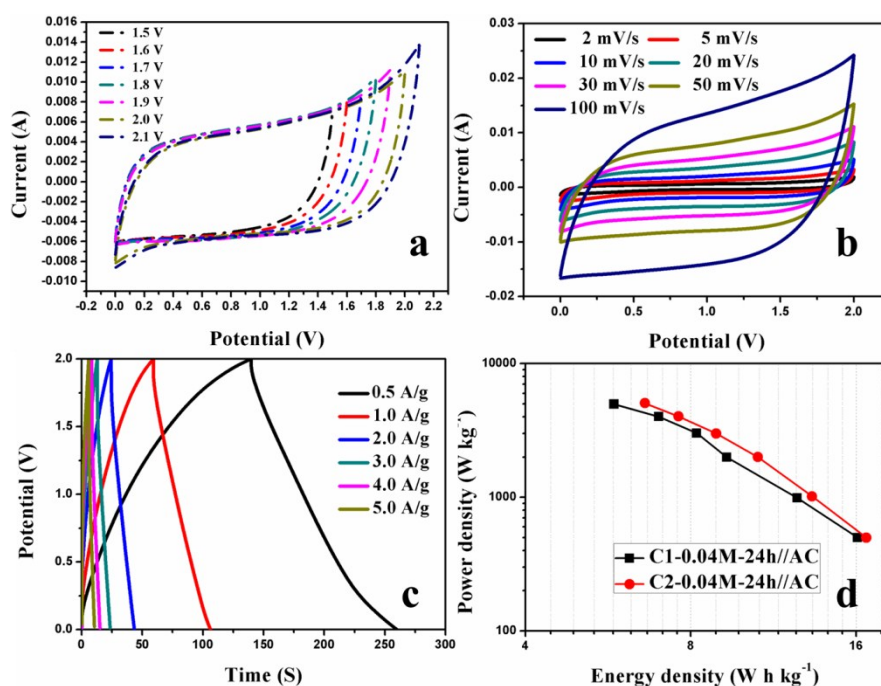

**Fig. S14.** CV curves of (a) C2-0.04M-24h//AC ASC device ranged in different potential window at a scan rate of  $30 \text{ mV s}^{-1}$ . (b) CV curves of C2-0.04M-24h//AC ASC device at different sweep rates. (c) CP curves of C2-0.04M-24h//AC ASC device at different current densities. (d) Ragone plots of energy density and power density of C1-0.04M-24h//AC and C2-0.04M-24h//AC.

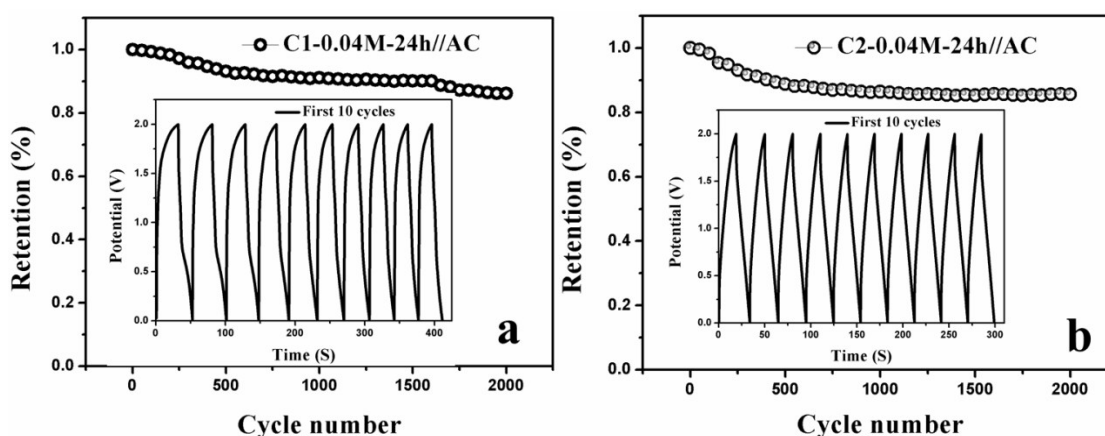

**Fig. S15.** Endurance test for C1-0.04M-24h//AC and C2-0.04M-24h//AC ASC devices at a current density of  $2 \text{ A g}^{-1}$ . Inset: the first ten continuous cycles.

**Table S1.** The content of Mn and C of C2-x-y tested from XPS spectra

| Samples        | Element (atomic concentration %) |       |
|----------------|----------------------------------|-------|
|                | Mn                               | C     |
| C2             | 5.59                             | 36.82 |
| C2-0.01M-45min | 21.84                            | 22.38 |
| C2-0.04M-45min | 22.11                            | 20.08 |
| C2-0.10M-45min | 22.82                            | 19.11 |
| C2-0.01M-24h   | 20.02                            | 21.27 |
| C2-0.04M-24h   | 22.17                            | 19.52 |
| C2-0.10M-24h   | 24.30                            | 18.82 |

**Table S2.** Summary of N-doped materials reported in references.

| Sample         | N (At%)   | Reference | Method                    |
|----------------|-----------|-----------|---------------------------|
| C1-0.01M-45min | 12.11     | this work | MOF pyrolysis             |
| C2-0.01M-45min | 14.79     |           |                           |
| C1             | 17.92     |           |                           |
| C2             | 24.19     |           |                           |
| N-Graphene     | 0.11-1.35 | 35        | N plasma treatment        |
| N-ZnO          | 5.0       | 36        | Solvothermal              |
| N-Carbon film  | 12.0      | 37        | Sputtering                |
| N-doped carbon | 0.68-7.64 | 38        | Precursor                 |
| N,S-carbon     | 0.1-2.9   | 39        | NH <sub>3</sub> treatment |

**Table S3.** The proportions of carbon/nitrogen (C/N) determined from XPS spectra

| Samples        | C/N  | Samples        | C/N  |
|----------------|------|----------------|------|
| C1-0.01M-45min | 2.97 | C2-0.01M-45min | 1.57 |
| C1-0.04M-45min | 3.90 | C2-0.04M-45min | 1.86 |

|                |      |                |      |
|----------------|------|----------------|------|
| C1-0.10M-45min | 5.00 | C2-0.10M-45min | 1.88 |
| C1-0.01M-24h   | 3.96 | C2-0.01M-24h   | 1.77 |
| C1-0.04M-24h   | 6.76 | C2-0.04M-24h   | 1.84 |
| C1-0.10M-24h   | 7.96 | C2-0.10M-24h   | 2.48 |
| C1             | 2.25 | C2             | 1.52 |

**Table S4.** The conductive data for solid samples through Four-point Probe.

| <b>Samples+AB</b>       | <b>d (cm)</b> | <b><math>\sigma</math> (S·cm<sup>-1</sup>)</b> | <b>Proportion</b> | <b>N (At%)</b> | <b>C/N ratio</b> |
|-------------------------|---------------|------------------------------------------------|-------------------|----------------|------------------|
| C1-0.01M-45min          | 0.54          | $9.71 \times 10^{-3}$                          | 75%:15%           | 12.11          | 2.97             |
| C1-0.04M-45min          | 0.50          | $4.00 \times 10^{-2}$                          | 75%:15%           | 8.53           | 3.90             |
| C1-0.10M-45min          | 0.47          | $7.25 \times 10^{-3}$                          | 75%:15%           | 5.07           | 5.00             |
| C1-0.01M-24h            | 0.46          | $1.64 \times 10^{-2}$                          | 75%:15%           | 8.54           | 3.96             |
| C1-0.04M-24h            | 0.50          | 0.156                                          | 75%:15%           | 3.50           | 6.76             |
| C1-0.10M-24h            | 0.47          | $9.01 \times 10^{-3}$                          | 75%:15%           | 2.58           | 7.96             |
| C2-0.01M-45min          | 0.54          | $1.98 \times 10^{-3}$                          | 75%:15%           | 14.79          | 1.57             |
| C2-0.04M-45min          | 0.50          | 0.152                                          | 75%:15%           | 10.80          | 1.86             |
| C2-0.10M-45min          | 0.54          | $1.45 \times 10^{-2}$                          | 75%:15%           | 10.19          | 1.88             |
| C2-0.01M-24h            | 0.47          | 0.258                                          | 75%:15%           | 12.04          | 1.77             |
| C2-0.04M-24h            | 0.47          | 0.341                                          | 75%:15%           | 10.62          | 1.84             |
| C2-0.10M-24h            | 0.50          | $2.60 \times 10^{-2}$                          | 75%:15%           | 7.60           | 2.48             |
| acetylene black<br>(AB) | 1.48          | 0.140                                          | /                 | /              | /                |

**Table S5.** Summary of electrochemical measurements in recent papers for MnO<sub>x</sub> electrodes.

| Sample of MnO <sub>x</sub>                 | Electrolyte                                    | Measurement protocol   | Maximum capacitance (F/g) | Capacitance retention after cycle test | Ref.      |
|--------------------------------------------|------------------------------------------------|------------------------|---------------------------|----------------------------------------|-----------|
| Mn <sub>3</sub> O <sub>4</sub> film        | 1 M Na <sub>2</sub> SO <sub>4</sub>            | CV ( $\nu = 10$ mV/s)  | 193                       | /                                      | 41a       |
| graphene / Mn <sub>3</sub> O <sub>4</sub>  | 1 M Na <sub>2</sub> SO <sub>4</sub><br>6 M KOH | CV ( $\nu = 5$ mV/s)   | 175<br>256                | /                                      | 41b       |
| Mn <sub>3</sub> O <sub>4</sub> powder      | 2 M KCl                                        | CV ( $\nu = 5$ mV/s)   | 148                       | almost 100% after 400 cycles           | 42        |
| MWCNT/ Mn <sub>3</sub> O <sub>4</sub> film | 0.5 M Na <sub>2</sub> SO <sub>4</sub>          | CV ( $\nu = 2$ mV/s)   | 143                       | 81% after 1000 cycles                  | 43        |
| Mn <sub>3</sub> O <sub>4</sub> @ C NWs     | 1 M Na <sub>2</sub> SO <sub>4</sub>            | CV ( $\nu = 2.5$ mV/s) | 197                       | 92% after 3000 cycles                  | 44        |
| MC-CS-MnO <sub>2</sub>                     | 1 M Na <sub>2</sub> SO <sub>4</sub>            | CP ( $i = 0.5$ A/g)    | 326                       | >100% after 1000 cycles                | 45a       |
| GO-DE@ MnO <sub>2</sub>                    | 1 M Na <sub>2</sub> SO <sub>4</sub>            | CP ( $i = 2.0$ A/g)    | 152.5                     | 83.3% after 2000 cycles                | 45b       |
| MnO <sub>2</sub> /CNT                      | 1 M Na <sub>2</sub> SO <sub>4</sub>            | CP ( $i = 0.5$ A/g)    | 370                       | about 100% after 4000 cycles           | 46a       |
| PDA@MnO <sub>2</sub>                       | 1 M Na <sub>2</sub> SO <sub>4</sub>            | CP ( $i = 2.0$ A/g)    | 193                       | 81.2% after 2500 cycles                | 46b       |
| CF@MnO <sub>2</sub>                        | 0.5 M Na <sub>2</sub> SO <sub>4</sub>          | CP ( $i = 1.0$ A/g)    | 321.3                     | 99.7% after 3000 cycles                | 47a       |
| MnO <sub>2</sub> nanoflakes                | 0.5 M Na <sub>2</sub> SO <sub>4</sub>          | CV ( $\nu = 2$ mV/s)   | 272.2                     | 88.7% after 5000 cycles                | 47b       |
| MnO <sub>2</sub> /GP CN-SS                 | 1 M Na <sub>2</sub> SO <sub>4</sub>            | CP ( $i = 0.5$ A/g)    | 438                       | /                                      | 48        |
| MnO <sub>2</sub> /graphene                 | 1 M Na <sub>2</sub> SO <sub>4</sub>            | CV ( $\nu = 5$ mV/s)   | 292.9                     | 91.5% after 1000 cycles                | 49a       |
| SG/CNTs/ MnO <sub>2</sub>                  | 1 M Na <sub>2</sub> SO <sub>4</sub>            | CP ( $i = 0.5$ A/g)    | 336.4                     | 91.3% after 10000 cycles               | 49b       |
| C1-0.04M-24h                               | 0.5 M Na <sub>2</sub> SO <sub>4</sub>          | CV ( $\nu = 5$ mV/s)   | 384.8                     | 88.9% after 5000 cycles                | this work |



|                      |                                          |                         |       |                            |
|----------------------|------------------------------------------|-------------------------|-------|----------------------------|
| C2-<br>0.04M-<br>24h | 0.5 M<br>Na <sub>2</sub> SO <sub>4</sub> | CV ( $\nu = 5$<br>mV/s) | 392.3 | 89.5% after 5000<br>cycles |
|----------------------|------------------------------------------|-------------------------|-------|----------------------------|

**Table S6.** Rate capability of C1-x-y and C2-x-y electrodes

| Samples        | Rate capability (%) | Samples        | Rate capability (%) |
|----------------|---------------------|----------------|---------------------|
| C1-0.01M-45min | 55.1                | C2-0.01M-45min | 72.6                |
| C1-0.04M-45min | 69.4                | C2-0.04M-45min | 49.5                |
| C1-0.10M-45min | 60.2                | C2-0.10M-45min | 69.6                |
| C1-0.01M-24h   | 66.8                | C2-0.01M-24h   | 81.7                |
| C1-0.04M-24h   | 68.5                | C2-0.04M-24h   | 80.5                |
| C1-0.10M-24h   | 51.3                | C2-0.10M-24h   | 46.8                |

**Table S7.** The simulated resistance value for as-prepared electrodes

| Samples        | $R_s$ | $R_{ct}$ | Samples        | $R_s$ | $R_{ct}$ |
|----------------|-------|----------|----------------|-------|----------|
| C1-0.01M-45min | 3.35  | 9.41     | C2-0.01M-45min | 3.11  | 9.20     |
| C1-0.04M-45min | 3.70  | 5.92     | C2-0.04M-45min | 3.33  | 5.83     |
| C1-0.10M-45min | 4.38  | 11.50    | C2-0.10M-45min | 3.76  | 9.44     |
| C1-0.01M-24h   | 2.07  | 6.26     | C2-0.01M-24h   | 3.06  | 6.92     |
| C1-0.04M-24h   | 1.97  | 5.93     | C2-0.04M-24h   | 1.94  | 5.57     |
| C1-0.10M-24h   | 3.87  | 22.75    | C2-0.10M-24h   | 3.58  | 30.33    |
